# Supplementary material
Source: ML conference proceedings conference paper supplement (https://openreview.net/forum?id=6L3yCjx9s3)
Supplement: supplementary_material [file Dimension_Adaptive_MCTS__Optimal_Sample_Complexity_for_Continuous_Action_Planning-sup.pdf › 19231_Dimension_Adaptive_MCTS__Supplementary Material/Dimension_Adaptive_MCTS__Optimal_Sample_Complexity_for_Continuous_Action_Planning-sup.pdf]

# Appendices

## A STRUCTURE OF THE APPENDICES

This appendix is organized as follows:

- Section B: Mathematical notation used throughout the paper
- Section C: Supporting lemmas for the theoretical analysis
- Section D: Convergence proofs for PM-DA-MCTS in non-stationary bandits
- Section E: Experimental details and hyperparameter selection
- Section F: Exponential Dependence on  $d$  and Guarantees Under a Capped Implementation

## B NOTATION

Table 6: Principal symbols for the non-stationary multi-armed bandit model used throughout the paper.

| Symbol            | Set / Type            | Meaning                                                                                                                      |
|-------------------|-----------------------|------------------------------------------------------------------------------------------------------------------------------|
| $K$               | $\mathbb{N}$          | Number of arms                                                                                                               |
| $T_a(t)$          | $\mathbb{N}$          | Number of times arm $a$ has been pulled up to (and including) round $t$                                                      |
| $\mu_a$           | $\mathbb{R}$          | True (possibly time-varying) mean reward of arm $a$                                                                          |
| $a_\star$         | $\mathcal{A}$         | Index of an optimal arm, i.e. $a_\star \in \arg \max_a \mu_a$                                                                |
| $\mu_\star$       | $\mathbb{R}$          | Optimal mean reward, $\mu_\star = \max_a \mu_a$                                                                              |
| $\hat{\mu}_{a,n}$ | $\mathbb{R}$          | Empirical mean of arm $a$ after $n$ pulls, i.e. $\frac{1}{n} \sum_{s=1}^n Y_{a,s}$                                           |
| $\hat{\mu}_n(p)$  | $\mathbb{R}$          | Power-mean estimator at time $n$ , $(\sum_{a=1}^K \frac{T_a(n)}{n} \hat{\mu}_{a,T_a(n)}^p)^{1/p}$ , with $p \in [1, \infty)$ |
| $\Delta_a$        | $\mathbb{R}_{\geq 0}$ | Gap of arm $a$ : $\Delta_a = \mu_\star - \mu_a$                                                                              |
| $A_a(n)$          | $\mathbb{N}$          | Safety index for arm $a$ (Eq. equation 13), threshold beyond which its bonus term is $\leq \Delta_a/2$                       |
| $U_{a,n,s}$       | $\mathbb{R}$          | Upper-confidence value used by the algorithm (see Lemma 5)                                                                   |
| $p$               | parameter             | Power-mean exponent (backup operator)                                                                                        |

## C SUPPORTING LEMMAS

In this section, we will present all necessary supporting Lemmas for the main theoretical analysis.

We start with a result of the following lemma which plays an important role in the analysis of our MCTS algorithm.

**Lemma 1** (Lemma 1 Dam et al. (2024)). *For  $m \in [M]$ , let  $(\hat{V}_{m,n})_{n \geq 1}$  be a sequence of estimator satisfying  $\hat{V}_{m,n} \xrightarrow{\alpha, \zeta} V_m$ , and there exists a constant  $L$  such that  $\hat{V}_{m,n} \leq L, \forall n \geq 1$ . Let  $X_i$  be an iid sequence with mean  $\mu$  and  $S_i$  be an iid sequence from a distribution  $p = (p_1, \dots, p_M)$  supported on  $\{1, \dots, M\}$ . Introducing the random variables  $N_m^n = \#\{i \leq n : S_i = s_m\}$ , we define the sequence of estimator*

$$\hat{Q}_n = \frac{1}{n} \sum_{i=1}^n X_i + \gamma \sum_{m=1}^M \frac{N_m^n}{n} \hat{V}_{m,N_m^n}.$$

Table 7: Key symbols used in the Monte-Carlo Tree-Search (MCTS) analysis.

| Symbol              | Set / Type      | Meaning                                                        |
|---------------------|-----------------|----------------------------------------------------------------|
| $\mathcal{T}$       | tree            | Search tree maintained by the algorithm                        |
| $s_h$               | node / state    | State encountered at depth $h$ ( $h = 0$ at the root)          |
| $h$                 | $\mathbb{N}$    | Depth index (planning step)                                    |
| $H$                 | $\mathbb{N}$    | Planning horizon / maximum depth                               |
| $\mathcal{A}_s$     | set             | Feasible actions at state $s$                                  |
| $a$                 | action          | A concrete action $a \in \mathcal{A}_s$                        |
| $N_s(n)$            | $\mathbb{N}$    | Visit count of node $s$ after $n$ simulations                  |
| $N_{s,a}(n)$        | $\mathbb{N}$    | Visit count of edge $(s, a)$ after $n$ simulations             |
| $\hat{Q}_n(s, a)$   | $\mathbb{R}$    | Empirical $Q$ -value at $(s, a)$ after $n$ simulations         |
| $\hat{V}_n(s)$      | $\mathbb{R}$    | Backup value of node $s$ after $n$ simulations (power mean)    |
| $U_n(s, a)$         | $\mathbb{R}$    | Upper confidence bound used for selection (algorithm-specific) |
| $\gamma$            | $(0, 1]$        | Discount factor for future rewards                             |
| $\text{Rollout}(s)$ | random variable | Return of one simulation rollout starting from state $s$       |

Then with  $2\alpha \leq \zeta, \zeta > 1$ ,

$$\hat{Q}_n \xrightarrow{\alpha, \zeta} \mu + \sum_{m=1}^M p_m V_m.$$

**Lemma 2** (Lemma 2 Dam et al. (2024)). *Let consider non-negative variables  $x, y \in \mathbb{R}^+$ , and a constant  $m$  that  $0 \leq m \leq 1$ . Then*

$$(x + y)^m \leq x^m + y^m. \quad (10)$$

We use Minkowski’s inequality as shown below

**Lemma 3(Minkowski’s inequality).** *Given  $p \geq 1, \{x_i, y_i\} \in \mathbb{R}, i = 1, 2, \dots, n$ , then we have the following inequality*

$$\left( \sum_i (|x_i + y_i|)^p \right)^{\frac{1}{p}} \leq \left( \sum_i (|x_i|)^p \right)^{\frac{1}{p}} + \left( \sum_i (|y_i|)^p \right)^{\frac{1}{p}} \quad (11)$$

*Proof.* This is a basic result.  $\square$

## D CONVERGENCE OF PM-DA-MCTS IN NON-STATIONARY MULTI-ARMED BANDITS

Every node of an MCTS tree forms its own non-stationary multi-armed bandit: the empirical reward of an action drifts as the parent’s selection strategy evolves over time. To analyse such drift formally we prove that the *power-mean* backup estimator at the root converges and concentrates.

**Road-map of the proof.** The main concentration result for the power-mean estimator is stated in Theorem 1. Its proof reduces to a series of increasingly specialised lemmas:

- Lemma 4 bounds the probability that the empirical mean of the *optimal* arm deviates from  $\mu_*$  after  $T_{a_*}(n)$  pulls.

- Lemma 5 provides single-step tail bounds; combined with it, Lemma 6 yields a high-probability bound on how often each sub-optimal arm is selected.
- Lemma 7 decomposes the power-mean error into an *optimal-arm* term and an aggregate *sub-optimal-arm* term. The two parts are then treated separately by Lemma 8 and Lemma 9.
- These auxiliary results are assembled in Lemma 10, which in turn implies Theorem 1.

Together, the lemmas ensure that the power-mean backup operator enjoys polynomial tail bounds even under the non-stationarity induced by tree search, laying the foundation for the global convergence guarantees that follow.

**Lemma 4** (Optimal-arm deviation). *In the bandit model of Section 5.1 let*

$$A(n) := \left( \frac{2Cn^{\frac{b}{\zeta}}}{\Delta} \right)^{\frac{\zeta}{\alpha}}, \quad \Delta := \min_{a \neq a_*} (\mu_* - \mu_a),$$

and fix parameters with  $R \geq \epsilon \geq n^{-\alpha/\zeta}$ . Then

$$\Pr\left(|\hat{\mu}_{a_*, T_{a_*}(n)} - \mu_*| > \epsilon\right) \leq \sum_{a \neq a_*} \Pr(T_a(n) > A(n) + 1) + \frac{c}{\alpha - 1} \epsilon^{-\zeta} [n - (K - 1)A(n) + 1]^{-\alpha + 1}.$$

*Proof.* Define the event

$$\mathcal{E} := \left\{ \sum_{a \neq a_*} T_a(n) > (K - 1)[A(n) + 1] \right\}.$$

Split the probability as

$$\Pr(|\hat{\mu}_{a_*, T_{a_*}(n)} - \mu_*| > \epsilon) \leq \Pr(\mathcal{E}) + D_1, \quad (12)$$

where

$$D_1 := \Pr(\mathcal{E}^c; |\hat{\mu}_{a_*, T_{a_*}(n)} - \mu_*| \geq \epsilon).$$

**Bounding  $D_1$ .** On  $\mathcal{E}^c$  we have  $T_{a_*}(n) \geq n - (K - 1)[A(n) + 1]$ . Hence

$$\begin{aligned} D_1 &\leq \sum_{t=n-(K-1)(A(n)+1)}^n \Pr(|\hat{\mu}_{a_*, t} - \mu_*| \geq \epsilon) \\ &\leq c \epsilon^{-\zeta} \sum_{t=n-(K-1)(A(n)+1)}^n t^{-\alpha} \\ &\leq c \epsilon^{-\zeta} \int_{n-(K-1)(A(n)+1)-1}^{\infty} t^{-\alpha} dt \\ &= \frac{c}{\alpha - 1} \epsilon^{-\zeta} [n - (K - 1)(A(n) + 1) - 1]^{-\alpha + 1}, \quad (\alpha > 2). \end{aligned}$$

**Final bound.** Substituting this estimate into equation 12 gives the claim.  $\square$

We introduce the notation  $U_{a,t,s} = \hat{\mu}_{a,s} + L\varepsilon_k^\beta + C \frac{t^{\frac{b}{\zeta}}}{s^{\frac{\alpha}{\zeta}}}$  and introduce that for all  $a$  the quantity

$$A_a(t) := \inf \left\{ s \leq t : C \frac{t^{\frac{b}{\zeta}}}{s^{\frac{\alpha}{\zeta}}} \leq \frac{\Delta_a}{2} \right\} = \left( \frac{2C}{\Delta_a} \right)^{\frac{\zeta}{\alpha}} t^{\frac{b}{\alpha}}, \quad (13)$$

where  $\Delta_a = \mu_* - \mu_a$ , the concentration properties permits to prove the following Lemma.

**Lemma 5** (Basic concentration). *Consider the non-stationary  $K$ -armed bandit of Section 5.1. Assume each empirical mean obeys the tail condition  $\hat{\mu}_{a,s} \xrightarrow{\alpha, \zeta} \mu_a$ . Fix*

$$U_{a,n,s} := \hat{\mu}_{a,s} + L\varepsilon_k^\beta + C \frac{n^{\frac{b}{\zeta}}}{s^{\frac{\alpha}{\zeta}}}, \quad 1 \leq s \leq n,$$

where  $L\varepsilon_k^\beta$  is defined at Section 4. Let  $\Delta_a := \mu_* - \mu_a > 0$ .

(i) **Lower tail.** For every  $s \in \{1, \dots, n\}$ ,

$$\Pr(U_{a,n,s} < \mu_a) \leq c C^{-\zeta} n^{-b}.$$

(ii) **Upper tail beyond the safety index.** Define the safety index

$$A_a(n) := \left(\frac{2C}{\Delta_a}\right)^{\zeta/\alpha} n^{b/\alpha}.$$

If  $s \geq A_a(n)$  and  $L\varepsilon_k^\beta \leq \frac{\Delta_a}{2}$  (which always holds once  $k$  is large enough), then

$$\Pr(U_{a,n,s} > \mu_*) \leq c C^{-\zeta} n^{-b}.$$

*Proof.* (i) **Lower tail.** Because  $L\varepsilon_k^\beta > 0$ , the event  $U_{a,n,s} < \mu_a$  implies  $\hat{\mu}_{a,s} - \mu_a < -C n^{b/\zeta} s^{-\alpha/\zeta}$ . Applying the concentration assumption directly gives

$$\Pr(U_{a,n,s} < \mu_a) \leq c C^{-\zeta} n^{-b},$$

as required.

(ii) **Upper tail.** For every  $s \geq A_a(n)$  we have  $C n^{b/\zeta} s^{-\alpha/\zeta} \leq \Delta_a/2$ . Under the additional requirement  $L\varepsilon_k^\beta \leq \Delta_a/2$  (the algorithm's tuning ensures this once the tree is sufficiently refined), we obtain

$$U_{a,n,s} > \mu_* \implies \hat{\mu}_{a,s} - \mu_a > \Delta_a - (L\varepsilon_k^\beta + C n^{b/\zeta} s^{-\alpha/\zeta}) \geq \frac{\Delta_a}{2}.$$

Hence

$$\Pr(U_{a,n,s} > \mu_*) \leq \Pr(\hat{\mu}_{a,s} - \mu_a > \frac{\Delta_a}{2}) \leq c C^{-\zeta} n^{-b},$$

again by the tail assumption with  $\epsilon = \Delta_a/2$ .  $\square$

In turn, Lemma 6 permits us to prove the following crucial high-probability bound on the number of selection of each sub-optimal arm.

**Lemma 6** (HP-bound on visits). *Fix the bandit model of Section 5.1 with some constant  $b > 1$ . For every sub-optimal arm  $a$ , set*

$$A_a(n) := \left(\frac{2C}{\Delta_a}\right)^{\frac{\zeta}{\alpha}} n^{\frac{b}{\alpha}}.$$

Then, for any threshold  $u \geq A_a(n)$ ,

$$\Pr(T_a(n) \geq u) \leq \frac{2c C^{-\zeta}}{b-1} (u-1)^{-(b-1)}.$$

*Proof.* First, for a real number  $\tau$  define

$$\mathcal{E}_1 := \{ U_{a,t,u} \leq \tau \text{ for all } t \in [u, n] \cap \mathbb{Z} \},$$

$$\mathcal{E}_2 := \{ U_{a^*, u+t_0, t_0} > \tau \text{ for all } t_0 \in [1, n-u] \cap \mathbb{Z} \}.$$

If both events hold, arm  $a$  cannot be chosen once it has accrued  $u$  plays; hence

$$\mathcal{E}_1 \cap \mathcal{E}_2 \implies T_a(n) \leq u.$$

Thus

$$\Pr(T_a(n) \geq u) \leq \Pr(\mathcal{E}_1^c) + \Pr(\mathcal{E}_2^c).$$

Second, Using the union bound and rewriting:

$$\Pr(T_a(n) \geq u) \leq \sum_{t=u}^n \Pr(U_{a,t,u} > \tau) + \sum_{t_0=1}^{n-u} \Pr(U_{a^*, u+t_0, t_0} \leq \tau).$$

Because  $u \geq A_a(n)$ , Lemma 5 yields

$$\Pr(U_{a,t,u} > \mu_*) \leq c C^{-\zeta} t^{-b}, \quad \Pr(U_{a^*, u+t_0, t_0} \leq \mu_*) \leq c C^{-\zeta} (u+t_0)^{-b}.$$

Hence

$$\sum_{t=u}^n cC^{-\zeta} t^{-b} \leq cC^{-\zeta} \int_{u-1}^{\infty} t^{-b} dt = \frac{cC^{-\zeta}}{b-1} (u-1)^{-(b-1)},$$

$$\sum_{t_0=1}^{n-u} cC^{-\zeta} (u+t_0)^{-b} \leq cC^{-\zeta} \int_{u-1}^{\infty} t^{-b} dt = \frac{cC^{-\zeta}}{b-1} (u-1)^{-(b-1)}.$$

Adding the two identical bounds gives the claimed result:

$$\Pr(T_a(n) \geq u) \leq \frac{2cC^{-\zeta}}{b-1} (u-1)^{-(b-1)}.$$

□

**Lemma 7** (Lemma 7 Dam et al. (2024)). *Let us define the power mean estimator  $\hat{\mu}_n(p)$  as  $\hat{\mu}_n(p) = \left( \sum_{a=1}^K \frac{T_a(n)}{n} \hat{\mu}_{a,T_a(n)}^p \right)^{\frac{1}{p}}$ . For any  $p \geq 1$ , we have*

$$|\hat{\mu}_n(p) - \mu_*| \leq R \sum_{a=1, a \neq a_*}^K \frac{T_a(n)}{n} + \left( \sum_{a=1}^K \frac{T_a(n)}{n} (|\hat{\mu}_{a,T_a(n)} - \mu_a|^p) \right)^{\frac{1}{p}} \quad (14)$$

**Lemma 8** (Optimal-arm term). *Let the bandit model of Section 5.1 satisfy the tail assumption  $\hat{\mu}_{a,n} \xrightarrow{\alpha, \zeta} \mu_a$  with  $\alpha > 2$  and  $b > 1$ . Recall*

$$A(n) := \left( \frac{2cC^{b/\zeta}}{\Delta} \right)^{\zeta/\alpha}, \quad \Delta := \min_{a \neq a_*} (\mu_* - \mu_a),$$

and fix a scale  $R \geq \epsilon \geq n^{-\alpha/\zeta}$ . Then, for every  $p \geq 1$ ,

$$\Pr\left(\frac{T_{a_*(n)}}{n} |\hat{\mu}_{a_*,T_{a_*(n)}} - \mu_*|^p > \epsilon^p\right) \leq \frac{2cC^{-\zeta}(K-1)}{b-1} A(n)^{-(b-1)} + \frac{c}{\alpha-1} \epsilon^{-\zeta} [n - (K-1)(A(n)+1) - 1]^{-\alpha+1}.$$

*Proof. Reduce to a simpler deviation.* Because  $\frac{T_{a_*(n)}}{n} \leq 1$ ,

$$\Pr\left(\frac{T_{a_*(n)}}{n} |\hat{\mu}_{a_*,T_{a_*(n)}} - \mu_*|^p > \epsilon^p\right) \leq \Pr(|\hat{\mu}_{a_*,T_{a_*(n)}} - \mu_*| > \epsilon).$$

**Apply Lemma 4.** Lemma 4 gives, for the right-hand probability,

$$\Pr(|\hat{\mu}_{a_*,T_{a_*(n)}} - \mu_*| > \epsilon) \leq \underbrace{\sum_{a \neq a_*} \Pr(T_a(n) > A(n) + 1)}_{F_{11}} + \underbrace{\frac{c}{\alpha-1} \epsilon^{-\zeta} [n - (K-1)(A(n) + 1) - 1]^{-\alpha+1}}_{F_{12}}.$$

**Bound the visit term  $F_{11}$ .** Lemma 6 yields, for every sub-optimal arm  $a \neq a_*$ ,

$$\Pr(T_a(n) > A(n) + 1) \leq \frac{2cC^{-\zeta}}{b-1} A(n)^{-(b-1)}.$$

Summing over the  $K-1$  sub-optimal arms gives

$$F_{11} \leq \frac{2cC^{-\zeta}(K-1)}{b-1} A(n)^{-(b-1)}.$$

**Combine the pieces.** Adding  $F_{11}$  and  $F_{12}$  completes the claimed inequality. □

**Lemma 9** (Upper bound for a sub-optimal arm). *Consider the  $K$ -armed bandit introduced in Section 5.1 and fix any sub-optimal arm  $a$ . Let  $R \geq \epsilon \geq n^{-\frac{\alpha}{\zeta}}$  and denote*

$$A(n) := \left( \frac{2cC^{b/\zeta}}{\Delta_a} \right)^{\frac{\zeta}{\alpha}}.$$

*There exists  $N_0 \in \mathbb{N}$  such that, for every  $n \geq N_0$ ,*

$$\Pr\left(\frac{T_a(n)}{n} |\hat{\mu}_{a,T_a(n)} - \mu_a|^p > \frac{\epsilon^p}{K-1}\right) \leq G_1 + G_2,$$

where the two terms admit the following explicit bounds:

(i) (**Small**  $p$ ) If  $1 \leq p \leq 2$  and  $\alpha \leq \frac{\zeta}{p}$ ,

$$G_1 + G_2 \leq \frac{2cC^{-\zeta}}{b-1} A(n)^{-(b-1)} + \frac{2c(K-1)^{\frac{\zeta}{p}}}{1 - (\alpha - \frac{\zeta}{p})} \epsilon^{-\zeta} [A(n) + 1]^{-(\alpha-1)}.$$

(ii) (**Moderate**  $p$ ) If  $p > 2$  and  $0 < \alpha - \frac{\zeta}{p} < 1$ ,

$$G_1 + G_2 \leq \frac{2cC^{-\zeta}}{b-1} A(n)^{-(b-1)} + \frac{c(K-1)^{\frac{\zeta}{p}}}{1 - (\alpha - \frac{\zeta}{p})} \epsilon^{-\zeta} [A(n) + 1]^{-(\alpha-1)}.$$

(iii) (**Large**  $p$ ) If  $p > 2$  and  $\alpha - \frac{\zeta}{p} > 1$ ,

$$G_1 + G_2 \leq \frac{2cC^{-\zeta}}{b-1} A(n)^{-(b-1)} + \frac{c(K-1)^{\frac{\zeta}{p}} (\alpha - \frac{\zeta}{p})}{(\alpha - \frac{\zeta}{p}) - 1} \epsilon^{-\zeta} [A(n) + 1]^{-\frac{\zeta}{p}}.$$

*Proof.* From Lemma 6, for every  $u > A_a(n) = A(n)$  we have

$$\Pr(T_a(n) > u) \leq \frac{2cC^{-\zeta}}{b-1} (u-1)^{-(b-1)}.$$

Define the events

$$\mathcal{E}_1 := \{T_a(n) > A(n) + 1\}, \quad \mathcal{E}_1^c := \{T_a(n) \leq A(n) + 1\}.$$

Using the law of total probability,

$$\Pr\left(\frac{T_a(n)}{n} \mid \hat{\mu}_{a,T_a(n)} - \mu_a \mid^p > \frac{\epsilon^p}{K-1}\right) \leq \underbrace{\Pr(\mathcal{E}_1)}_{=:G_1} + \underbrace{\sum_{t=1}^{A(n)+1} \Pr\left(\frac{t}{n} \mid \hat{\mu}_{a,t} - \mu_a \mid^p > \frac{\epsilon^p}{K-1}\right)}_{=:G_2}.$$

**Bounding  $G_1$ .** Directly from the visit-probability bound,

$$G_1 = \Pr(T_a(n) > A(n) + 1) \leq \frac{2cC^{-\zeta}}{b-1} A(n)^{-(b-1)}.$$

**Bounding  $G_2$ .** For all  $t \leq A(n) + 1$  and  $n \geq N_0$ ,  $(\frac{n}{t(K-1)})^{1/p} \epsilon \geq \epsilon \geq n^{-\frac{\alpha}{p}}$ . Applying the tail assumption on the empirical-mean error (with constant  $c$ ):

$$\begin{aligned} G_2 &\leq \sum_{t=1}^{A(n)+1} c t^{-\alpha} \left[ \left( \frac{n}{t(K-1)} \right)^{1/p} \epsilon \right]^{-\zeta} \\ &= c(K-1)^{\frac{\zeta}{p}} \epsilon^{-\zeta} n^{-\frac{\zeta}{p}} \sum_{t=1}^{A(n)+1} t^{-(\alpha - \frac{\zeta}{p})}. \end{aligned}$$

The remaining sum is handled in three regimes, depending on the sign of  $\alpha - \frac{\zeta}{p}$ :

*Case (i)*  $\alpha - \frac{\zeta}{p} \leq 0$ . Using an integral comparison,

$$\sum_{t=1}^{A(n)+1} t^{-(\alpha - \frac{\zeta}{p})} \leq \frac{2[A(n) + 1]^{1 - (\alpha - \frac{\zeta}{p})}}{1 - (\alpha - \frac{\zeta}{p})},$$

which yields the bound claimed in part (i).

Case (ii)  $0 < \alpha - \frac{\zeta}{p} < 1$ . Evaluating the geometric sum,

$$\sum_{t=1}^{A(n)+1} t^{-(\alpha - \frac{\zeta}{p})} = \frac{\alpha - \frac{\zeta}{p}}{(\alpha - \frac{\zeta}{p}) - 1} - \frac{[A(n) + 1]^{1 - (\alpha - \frac{\zeta}{p})}}{(\alpha - \frac{\zeta}{p}) - 1},$$

which leads to the expression in part (ii).

Case (iii)  $\alpha - \frac{\zeta}{p} > 1$ . The same calculation gives

$$\sum_{t=1}^{A(n)+1} t^{-(\alpha - \frac{\zeta}{p})} \leq \frac{\alpha - \frac{\zeta}{p}}{(\alpha - \frac{\zeta}{p}) - 1},$$

hence the bound in part (iii).

Combining the estimates for  $G_1$  and  $G_2$  completes the proof.  $\square$

**Lemma 10** (Deviation of the  $p$ -power mean). *For the  $K$ -armed bandit of Section 5.1 let*

$$\hat{\mu}_n(p) := \left( \sum_{a=1}^K \frac{T_a(n)}{n} \hat{\mu}_{a, T_a(n)}^p \right)^{1/p}$$

*be the empirical power-mean estimator. Write  $\Delta_a := \mu_* - \mu_a$  and  $\Delta := \min_{a \in [K]} \Delta_a$ . Define*

$$A(n) := \left( \frac{2C n^{b/\zeta}}{\Delta} \right)^{\zeta/\alpha}, \quad \epsilon_0 := \frac{2^{1/p} n \epsilon}{x} + 2^{1/p} R(K-1)[3 + A(n)],$$

*where the parameters satisfy*

$$R \geq \epsilon \geq n^{-\alpha/\zeta}, \quad x \geq 1.$$

*There exists  $N_p \in \mathbb{N}$  such that for all  $n \geq N_p$*

$$\Pr\left(|\hat{\mu}_n(p) - \mu_*| \geq \frac{\epsilon_0 x}{n}\right) \leq \frac{8c C^{-\zeta} K R^\zeta \epsilon^{-\zeta} A(n)^{-(b-1)}}{b-1} + \frac{2c C^{-\zeta} (K-1)}{b-1} [2^{1/p} (3 + A(n)) x - 1]^{-(b-1)}.$$

*Proof.* **A deterministic decomposition.** Lemma 7 gives

$$|\hat{\mu}_n(p) - \mu_*| \leq R \sum_{a \neq a_*} \frac{T_a(n)}{n} + \left( \sum_{a=1}^K \frac{T_a(n)}{n} |\hat{\mu}_{a, T_a(n)} - \mu_a|^p \right)^{1/p}.$$

Because  $\frac{\epsilon_0 x}{n} = 2^{1/p} \epsilon + 2^{1/p} R(K-1)[3 + A(n)] \frac{x}{n}$ , the probability event splits as

$$\begin{aligned} \Pr\left(|\hat{\mu}_n(p) - \mu_*| > \frac{\epsilon_0 x}{n}\right) &\leq \underbrace{\Pr\left(R \sum_{a \neq a_*} \frac{T_a(n)}{n} > R(K-1) \frac{2^{1/p} [3 + A(n)] x}{n}\right)}_{=: H_1} \\ &\quad + \underbrace{\Pr\left(\left(\sum_{a=1}^K \frac{T_a(n)}{n} |\hat{\mu}_{a, T_a(n)} - \mu_a|^p\right)^{1/p} \geq 2^{1/p} \epsilon\right)}_{=: H_2}. \end{aligned}$$

**Bounding  $H_1$  (large visit counts).** For  $x \geq 1$ ,

$$H_1 \leq \sum_{a \neq a_*} \Pr(T_a(n) > 2^{1/p} [3 + A(n)] x) \stackrel{\text{Lemma 6}}{\leq} \frac{2c C^{-\zeta} (K-1)}{b-1} [2^{1/p} (3 + A(n)) x - 1]^{-(b-1)}.$$

**Bounding  $H_2$  (estimation errors).** Using Markov's inequality,

$$H_2 \leq F_1 + F_2, \quad \text{where} \quad \begin{cases} F_1 := \Pr\left(\frac{T_{a_*}(n)}{n} |\hat{\mu}_{a_*, T_{a_*}(n)} - \mu_{a_*}|^p > \epsilon^p\right), \\ F_2 := \sum_{a \neq a_*} \Pr\left(\frac{T_a(n)}{n} |\hat{\mu}_{a, T_a(n)} - \mu_a|^p > \frac{\epsilon^p}{K-1}\right). \end{cases}$$

(i) *Optimal arm.* Lemma 8 yields

$$F_1 \leq \frac{2c C^{-\zeta} (K-1)}{b-1} A(n)^{-(b-1)} + \frac{c}{\alpha-1} \epsilon^{-\zeta} [n - (K-1)(A(n)+1) - 1]^{-\alpha+1}.$$

(ii) *Sub-optimal arms.* Applying Lemma 9 in the two admissible parameter regimes (small  $p$  or moderate  $p$ ),

$$F_2 \leq \frac{2c C^{-\zeta} (K-1)}{b-1} A(n)^{-(b-1)} + \frac{c(K-1)^{\frac{\zeta}{p}+1}}{1 - (\alpha - \frac{\zeta}{p})} \epsilon^{-\zeta} (A(n)+1)^{-(\alpha-1)}.$$

Combining  $F_1$  and  $F_2$ , and using  $b-1 < \alpha-1$  together with  $\epsilon \geq n^{-\alpha/\zeta}$ , we can fix  $N_p$  large enough so that

$$H_2 \leq \frac{8c C^{-\zeta} K R^\zeta \epsilon^{-\zeta} A(n)^{-(b-1)}}{b-1}.$$

Adding the bounds for  $H_1$  and  $H_2$  completes the proof:

$$\Pr\left(|\hat{\mu}_n(p) - \mu_*| \geq \frac{\epsilon_0 x}{n}\right) \leq H_1 + H_2 \leq \frac{8c C^{-\zeta} K R^\zeta \epsilon^{-\zeta} A(n)^{-(b-1)}}{b-1} + \frac{2c C^{-\zeta} (K-1)}{b-1} [2^{1/p} (3+A(n))x - 1]^{-(b-1)}.$$

□

**Theorem 1** (Power-mean concentration in non-stationary bandits). *Let  $\{\mu_a\}_{a=1}^K$  be the (possibly drifting) arm means of the non-stationary bandit in Section 5.1. Assume each arm-estimator  $\hat{\mu}_{a,n}$  satisfies the tail condition  $\hat{\mu}_{a,n} \xrightarrow{\alpha, \zeta} \mu_a$  and that the algorithm uses the polynomial exploration bonus with parameters from Table 1.*

Define the empirical  $p$ -power mean

$$\hat{\mu}_n(p) := \left( \sum_{a=1}^K \frac{T_a(n)}{n} \hat{\mu}_{a, T_a(n)}^p \right)^{1/p}, \quad \mu_* = \max_a \mu_a.$$

Then  $\hat{\mu}_n(p)$  concentrates around  $\mu_*$  with exponents

$$\alpha' = (b-1) \left(1 - \frac{b}{\alpha}\right), \quad \zeta' = b-1,$$

i.e. there exist  $c' > 0$  and  $N_0$  such that for all  $n \geq N_0$  and all  $\epsilon \geq n^{-\alpha'/\zeta'}$ ,

$$\Pr\left(|\hat{\mu}_n(p) - \mu_*| \geq \epsilon\right) \leq c' n^{-\alpha'} \epsilon^{-\zeta'}.$$

*Proof.* Set  $\Delta_a = \mu_* - \mu_a$  and  $\Delta = \min_a \Delta_a$ . For brevity let  $A(n) := \left(\frac{2C n^{b/\zeta}}{\Delta}\right)^{\zeta/\alpha}$ .

**Parameterisation of the deviation scale.** Fix  $x \geq 1$ ,  $R \geq \epsilon \geq n^{-\alpha/\zeta}$ , and put

$$\epsilon_0 := \frac{2^{1/p} n \epsilon'}{x} + \frac{n R (K-1)}{x} 2^{1/p} [3 + A(n)], \quad \epsilon' := n^{-\alpha/\zeta} x.$$

With these choices

$$\frac{\epsilon_0 x}{n} = 2^{1/p} \epsilon' + 2^{1/p} R (K-1) \frac{[3+A(n)]x}{n}.$$

**Decomposition.** Lemma 10 implies, for  $n \geq N_p$ ,

$$\begin{aligned} D &:= \Pr(|\hat{\mu}_n(p) - \mu_\star| \geq \epsilon) \leq \Pr(|\hat{\mu}_n(p) - \mu_\star| \geq \frac{\epsilon_0 x}{n}) \\ &\leq \frac{8cC^{-\zeta} K R^\zeta \epsilon^{-\zeta} A(n)^{-(b-1)}}{b-1} + \frac{2cC^{-\zeta} (K-1)}{b-1} [2^{1/p}(3 + A(n))x - 1]^{-(b-1)}. \end{aligned} \quad (15)$$

**Replace the  $x$ -term.** Because  $x \geq 1$  and  $A(n) \geq 3$  for sufficiently large  $n$ ,  $2^{1/p}(3 + A(n))x - 1 \geq A(n)x$ . Using  $A(n)x = \frac{n\epsilon}{2^{1/p}R(2K-1)}$  (from the definition of  $\epsilon$  below) we substitute  $A(n)$  and rearrange each term of equation 15; tedious but direct algebra yields

$$D \leq c_0 n^{-\alpha'} \epsilon^{-\zeta'},$$

with the constants

$$\alpha' = (b-1)\left(1 - \frac{b}{\alpha}\right), \quad \zeta' = b-1, \quad c_0 = \frac{2^{b+\zeta/p} c C^{-\zeta} K (2K-1)^\zeta R^{2\zeta}}{(b-1)} \left(\frac{2C}{\Delta}\right)^{-\frac{\zeta}{\alpha}(b-1-\zeta)}.$$

**Extension to all  $n$ .** For  $n < N_0$  the bound holds trivially because  $|\hat{\mu}_n(p) - \mu_\star| \leq R$  while  $\epsilon \leq R$ . Choosing the same  $c_0$  for all  $n$  completes the probability statement.

**Convergence in expectation.** Since  $\zeta' = b-1 > 1$  (recall  $b > 2$ ), we have

$$|\mathbb{E} \hat{\mu}_n(p) - \mu_\star| \leq \int_0^\infty \Pr(|\hat{\mu}_n(p) - \mu_\star| \geq s) ds \xrightarrow{n \rightarrow \infty} 0,$$

establishing  $L^1$ -convergence and finishing the proof.  $\square$

**Theorem 2** (Concentration along the search tree). *Run Stochastic-Power-UCT with depth-dependent constants  $\{b_h\}_{h=0}^H$ ,  $\{\alpha_h\}_{h=0}^H$ ,  $\{\zeta_h\}_{h=0}^H$  satisfying Table 1. Then:*

(i) **Value nodes.** For every state  $s_h$  at depth  $h \in \{0, \dots, H\}$ ,

$$\hat{V}_n(s_h) \xrightarrow{\alpha_h, \zeta_h} \tilde{V}(s_h).$$

(ii) **Action nodes.** For every state  $s_h$  with  $h \in \{0, \dots, H-1\}$  and each  $a \in \mathcal{A}_{s_h}$ ,

$$\hat{Q}_n(s_h, a) \xrightarrow{\alpha_{h+1}, \zeta_{h+1}} \tilde{Q}(s_h, a).$$

*Proof.* We proceed by induction on the tree depth  $H$ .

**Base case  $H = 1$ .** The root is  $s_0$  and the only children are the leaf states  $s_1 \sim \mathcal{P}(\cdot | s_0, a)$ . Because every rollout value  $\hat{V}_n(s_1) = \frac{1}{n} \sum_{t=1}^n \text{Rollout}_t(s_1)$  is an average of i.i.d. returns, Lemma 1 gives

$$\hat{V}_n(s_1) \xrightarrow{\alpha_1, \zeta_1} \tilde{V}(s_1).$$

Using the empirical  $Q$ -definition

$$\hat{Q}_n(s_0, a) = \frac{1}{n} \sum_{t=1}^n \left[ r^{(t)}(s_0, a) + \gamma \hat{V}_{T_{s_0, a}^{s_1}(t)}(s_1) \right],$$

Lemma 1 yields

$$\hat{Q}_n(s_0, a) \xrightarrow{\alpha_1, \zeta_1} \tilde{Q}(s_0, a).$$

Finally, apply Theorem 1 to the value backup  $\hat{V}_n(s_0) = \left( \sum_a \frac{T_{s_0, a}(n)}{n} \hat{Q}_{T_{s_0, a}(n)}^p(s_0, a) \right)^{1/p}$  to obtain  $\hat{V}_n(s_0) \xrightarrow{\alpha_0, \zeta_0} \tilde{V}(s_0)$ . Thus both claims hold when  $H = 1$ .

**Induction step.** Assume the theorem is valid for all trees of depth  $H - 1$ . Consider a tree of depth  $H$ .

*Inside the depth- $(H - 1)$  subtrees.* For any child state  $s_1$  of the root  $s_0$ , apply the induction hypothesis to the subtree rooted at  $s_1$ :

$$\widehat{V}_n(s_h) \xrightarrow{\alpha_h, \zeta_h} \widetilde{V}(s_h), \quad h = 1, \dots, H, \quad (16)$$

$$\widehat{Q}_n(s_h, a) \xrightarrow{\alpha_{h+1}, \zeta_{h+1}} \widetilde{Q}(s_h, a), \quad h = 1, \dots, H - 1. \quad (17)$$

*Back at the root.* Using equation 16 in the same way as for the base case, Lemma 1 gives

$$\widehat{Q}_n(s_0, a) \xrightarrow{\alpha_1, \zeta_1} \widetilde{Q}(s_0, a), \quad a \in \mathcal{A}_{s_0}.$$

With these  $Q$ -concentration results and the power-mean backup, Theorem 1 again yields

$$\widehat{V}_n(s_0) \xrightarrow{\alpha_0, \zeta_0} \widetilde{V}(s_0).$$

**Conclusion.** Equations equation 16 plus the new bound on  $\widehat{V}_n(s_0)$  establish part (i); eqs. equation 17 plus the new bound on  $\widehat{Q}_n(s_0, a)$  establish part (ii). By induction, the theorem holds for every depth  $H$ .  $\square$

**Theorem 3 (Convergence of Expected Payoff).** *We have at the root node  $s_0$ , with the best possible parameter tuning that*

$$|\mathbb{E}[\widehat{V}_n(s_0)] - \widetilde{V}(s_0)| \leq \mathcal{O}(n^{-1/2}).$$

*Proof.* Using the convexity of  $f(x) = |x|$  and applying Jensen's inequality we have

$$\begin{aligned} |\mathbb{E}[\widehat{V}_n(s_0)] - \widetilde{V}(s_0)| &\leq \mathbb{E}[|\widehat{V}_n(s_0) - \widetilde{V}(s_0)|] \\ &= \int_0^{+\infty} \mathbb{P}\left(|\widehat{V}_n(s_0) - \widetilde{V}(s_0)| \geq s\right) ds \\ &\leq \int_0^{n^{-\frac{\alpha_0}{\zeta_0}}} 1 ds + \int_{n^{-\frac{\alpha_0}{\zeta_0}}}^{+\infty} c_0 n^{-\alpha_0} s^{-\zeta_0} ds \\ &\leq n^{-\frac{\alpha_0}{\zeta_0}} + c_0 n^{-\alpha_0} \left( \frac{s^{-\zeta_0+1}}{-\zeta_0+1} \right) \Big|_{n^{-\frac{\alpha_0}{\zeta_0}}}^{+\infty} \\ &= \left( \frac{c_0}{\zeta_0 - 1} + 1 \right) n^{-\frac{\alpha_0}{\zeta_0}}. \end{aligned}$$

Because  $\frac{\alpha_0}{\zeta_0} \leq \frac{1}{2}$  (Theorem 1), then the best possible rate we can estimate is

$$|\mathbb{E}[\widehat{V}_n(s_0)] - \widetilde{V}(s_0)| \leq \mathcal{O}(n^{-1/2}).$$

That concludes the proof.  $\square$

**Theorem 4** (Sample Complexity with Polynomial-tail Estimates). *PM-DA-MCTS returns an  $\varepsilon$ -optimal action at  $s_0$  with probability at least  $1 - \delta$  after at most*

$$N(\varepsilon, \delta) \leq C_1 \sigma^2 L^{\frac{d}{\beta}} \varepsilon^{-(\frac{d}{\beta}+2)} \log \left( \frac{C_2 L^{\frac{d}{\beta}}}{\varepsilon^{\frac{d}{\beta}} \delta} \right),$$

where  $C_1, C_2 > 0$  depend only on  $d, \beta$  and the refinement/selection constants (but not on  $\varepsilon, \delta, L, \sigma$ ).

**Proof. Nets and discretization schedule.** For each level  $k = 0, 1, 2, \dots$ , let  $\mathcal{N}_k \subset \mathcal{A}$  be an  $\varepsilon_k$ -net of  $\mathcal{A}$  with respect to  $\|\cdot\|_2$ , with a geometric schedule  $\varepsilon_{k+1} = \varepsilon_k/2$ . There exists a constant  $C_{\mathcal{A}} = C_{\mathcal{A}}(d)$  such that the net size satisfies

$$M_k \triangleq |\mathcal{N}_k| \leq C_{\mathcal{A}} \varepsilon_k^{-d} \quad \text{for all } k. \quad (18)$$

Let  $a^* \in \arg \max_{a \in \mathcal{A}} Q^*(s_0, a)$  denote an optimal action at the root. By the definition of  $\varepsilon_k$ -nets and Hölder continuity,

$$\max_{a \in \mathcal{N}_k} Q^*(s_0, a) \geq Q^*(s_0, a^*) - L \varepsilon_k^\beta. \quad (19)$$

Choose  $k^*$  as the smallest level such that

$$L \varepsilon_{k^*}^\beta \leq \varepsilon/2 < L \varepsilon_{k^*-1}^\beta. \quad (20)$$

Then  $\varepsilon_{k^*} \asymp (\varepsilon/L)^{1/\beta}$  and hence, by equation 18,  $M_{k^*} \lesssim (L/\varepsilon)^{d/\beta}$ .

**Median-of-Means (MOM) estimator and deviation bound.** Fix any action  $a \in \mathcal{A}$ . Let  $X_i(a)$  be i.i.d. single-simulation returns with  $\mathbb{E}[X_i(a)] = Q^*(s_0, a)$  and  $\text{Var}(X_i(a)) \leq \sigma^2$ . Given a total of  $n$  samples at  $(s_0, a)$ , partition them into  $B$  blocks of equal size  $m = \lfloor n/B \rfloor$ , form block means  $\bar{X}_1, \dots, \bar{X}_B$ , and define the MOM estimator

$$\hat{Q}_n^{\text{MOM}}(s_0, a) \triangleq \text{median}\{\bar{X}_1, \dots, \bar{X}_B\}.$$

We will use the following standard claim.

*Claim (MOM deviation).* There exist absolute constants  $c_0, c_1, c_2 > 0$  such that for any confidence  $\delta \in (0, 1)$ , if  $B \geq c_0 \log(2/\delta)$  and  $m \geq c_1 \sigma^2/t^2$ , then

$$\Pr \left\{ |\hat{Q}_n^{\text{MOM}}(s_0, a) - Q^*(s_0, a)| > t \right\} \leq \delta \quad \text{for } n = Bm. \quad (21)$$

*Proof of the claim.* For each block mean  $\bar{X}_j$ , by Chebyshev's inequality,  $\Pr\{|\bar{X}_j - Q^*(s_0, a)| > t\} \leq \sigma^2/(mt^2)$ . If  $m \geq c_1 \sigma^2/t^2$  with  $c_1 \geq 4$ , then the failure probability per block is at most  $1/4$ , hence each block is “good” with probability at least  $3/4$  independently. By a Chernoff bound, the probability that fewer than  $B/2$  blocks are good is at most  $\exp(-c_2 B)$  for a universal  $c_2 > 0$ . If  $B \geq c_0 \log(2/\delta)$  with  $c_0 \geq 1/c_2$ , then  $\exp(-c_2 B) \leq \delta/2$ . Conditioned on the event that at least  $B/2$  blocks are good, the median of the  $B$  block means must lie within  $t$  of  $Q^*(s_0, a)$ . Combining the two events gives equation 21.  $\square$

Setting  $t = \alpha L \varepsilon_k^\beta$  with a constant  $\alpha \in (0, 1)$  to be fixed, the claim shows that if

$$B_k \geq c_0 \log \left( \frac{2}{\delta_{k,a}} \right), \quad m_k \geq \frac{c_1 \sigma^2}{\alpha^2 L^2 \varepsilon_k^{2\beta}}, \quad n_k = B_k m_k, \quad (22)$$

then

$$\Pr \left\{ |\hat{Q}_{n_k}^{\text{MOM}}(s_0, a) - Q^*(s_0, a)| \leq \alpha L \varepsilon_k^\beta \right\} \geq 1 - \delta_{k,a}. \quad (23)$$

**Uniform confidence over all actions and levels up to  $k^*$ .** We will visit only actions in  $\bigcup_{k \leq k^*} \mathcal{N}_k$  before termination (since levels are refined monotonically down to  $\varepsilon_{k^*}$  by construction). Set confidence budgets

$$\delta_{k,a} = \frac{\delta}{4(k^*+1)M_k} \quad \text{for each } a \in \mathcal{N}_k, \quad k = 0, 1, \dots, k^*. \quad (24)$$

By a union bound across all  $k \leq k^*$  and  $a \in \mathcal{N}_k$ , the event

$$\mathcal{E} \triangleq \bigcap_{k=0}^{k^*} \bigcap_{a \in \mathcal{N}_k} \left\{ |\hat{Q}_{n_k}^{\text{MOM}}(s_0, a) - Q^*(s_0, a)| \leq \alpha L \varepsilon_k^\beta \right\}$$

satisfies  $\Pr(\mathcal{E}) \geq 1 - \delta/4$  provided  $n_k$  obey equation 22 with  $\delta_{k,a}$  as in equation 24.

Using equation 22 and equation 24, there exist constants  $C_b, C_m > 0$  such that

$$B_k \leq C_b \log \left( \frac{(k^*+1)M_k}{\delta} \right), \quad m_k \leq C_m \frac{\sigma^2}{L^2 \varepsilon_k^{2\beta}}. \quad (25)$$

Hence

$$n_k = B_k m_k \leq C \frac{\sigma^2}{L^2 \varepsilon_k^{2\beta}} \log \left( \frac{(k^*+1)M_k}{\delta} \right), \quad (26)$$

for a constant  $C = C_b C_m$  depending only on the universal constants from Step 1.

**Alignment with the selection/refinement rule.** The selection rule (Eq. equation 5) uses a polynomially decaying exploration bonus  $b_h N_{s,a}(t)^{-\zeta_h}$  together with a fixed discretization bias term  $L \varepsilon_k^\beta$ . Thus the algorithm *continues sampling* an action  $a \in \mathcal{N}_k(s)$  at level  $k$  while

$$b_h N_{s,a}(t)^{-\zeta_h} > \alpha L \varepsilon_k^\beta,$$

and it *refines* to level  $k+1$  only once, for all currently active actions in  $\mathcal{N}_k(s)$ ,

$$N_{s,a}(t) \geq n_k^{(\text{poly})} \triangleq \left( \frac{b_h}{\alpha L \varepsilon_k^\beta} \right)^{\frac{1}{\zeta_h}}. \quad (27)$$

In addition, to guarantee high-probability estimation accuracy for the value estimator we require a per-action lower bound

$$N_{s,a}(t) \geq n_k^{(\text{est})} \triangleq C \frac{\sigma^2}{L^2 \varepsilon_k^{2\beta}} \log\left(\frac{(k^*+1) M_k}{\delta}\right), \quad (28)$$

where  $M_k = |\mathcal{N}_k(s)|$  and  $C > 0$  is the constant from the estimator's deviation inequality. We therefore set

$$n_k \triangleq \max\{n_k^{(\text{poly})}, n_k^{(\text{est})}\}. \quad (29)$$

Under the uniform event  $\mathcal{E}$  (all per-action concentration events hold), the bonus is monotone in  $N_{s,a}$  and any under-sampled action remains optimistic; hence before leaving level  $k$  each active action has been sampled at most  $n_k$  times (up to a constant factor absorbed into  $C$ ).

**Correctness at the stopping level  $k^*$ .** On the event  $\mathcal{E}$ , when the algorithm reaches level  $k^*$  and each active action has at least  $n_{k^*}$  samples, for every  $a \in \mathcal{N}_{k^*}$  we have

$$|\hat{Q}_{n_{k^*}}^{\text{MOM}}(s_0, a) - Q^*(s_0, a)| \leq \alpha L \varepsilon_{k^*}^\beta.$$

Let  $\hat{a} \in \arg \max_{a \in \mathcal{N}_{k^*}} \hat{Q}_{n_{k^*}}^{\text{MOM}}(s_0, a)$  be the selected action. Let  $a_{k^*}^* \in \arg \max_{a \in \mathcal{N}_{k^*}} Q^*(s_0, a)$  denote a net-optimal action at level  $k^*$ . Then

$$\begin{aligned} Q^*(s_0, a^*) - Q^*(s_0, \hat{a}) &\leq \underbrace{[Q^*(s_0, a^*) - Q^*(s_0, a_{k^*}^*)]}_{\leq L \varepsilon_{k^*}^\beta \text{ by equation 19}} + \underbrace{[Q^*(s_0, a_{k^*}^*) - \hat{Q}_{n_{k^*}}^{\text{MOM}}(s_0, a_{k^*}^*)]}_{\leq \alpha L \varepsilon_{k^*}^\beta} \\ &\quad + \underbrace{[\hat{Q}_{n_{k^*}}^{\text{MOM}}(s_0, a_{k^*}^*) - \hat{Q}_{n_{k^*}}^{\text{MOM}}(s_0, \hat{a})]}_{\leq 0 \text{ by definition of } \hat{a}} \\ &\quad + \underbrace{[\hat{Q}_{n_{k^*}}^{\text{MOM}}(s_0, \hat{a}) - Q^*(s_0, \hat{a})]}_{\leq \alpha L \varepsilon_{k^*}^\beta}. \end{aligned}$$

Choosing  $\alpha = 1/4$  and recalling equation 20 gives

$$Q^*(s_0, a^*) - Q^*(s_0, \hat{a}) \leq \left(1 + \frac{1}{4} + \frac{1}{4}\right) L \varepsilon_{k^*}^\beta \leq \frac{3}{2} \cdot \frac{\varepsilon}{2} < \varepsilon.$$

Thus  $\hat{a}$  is  $\varepsilon$ -optimal at the root on the event  $\mathcal{E}$ .

**Sample complexity bound.** Let  $N_k$  denote the total number of samples taken at level  $k$  across all actions. By Step 3 and equation 26,

$$N_k \leq M_k n_k \leq C M_k \frac{\sigma^2}{L^2 \varepsilon_k^{2\beta}} \log\left(\frac{(k^*+1) M_k}{\delta}\right).$$

Using equation 18 and the geometric schedule  $\varepsilon_k = \varepsilon_0 2^{-k}$ , the sum over  $k = 0$  to  $k^*$  is dominated by the finest level:

$$\sum_{k=0}^{k^*} N_k \leq C' \sigma^2 \sum_{k=0}^{k^*} \varepsilon_k^{-(d+2\beta)} \log\left(\frac{(k^*+1) C_A \varepsilon_k^{-d}}{\delta}\right) \leq C'' \sigma^2 \varepsilon_{k^*}^{-(d+2\beta)} \log\left(\frac{C''' \varepsilon_{k^*}^{-d}}{\delta}\right).$$

Finally, by equation 20,  $\varepsilon_{k^*} \asymp (\varepsilon/L)^{1/\beta}$ , hence

$$\varepsilon_{k^*}^{-(d+2\beta)} = \left((\varepsilon/L)^{1/\beta}\right)^{-(d+2\beta)} = L^{\frac{d}{\beta}} \varepsilon^{-(\frac{d}{\beta}+2)}, \quad \log\left(\frac{C''' \varepsilon_{k^*}^{-d}}{\delta}\right) = \log\left(\frac{C_2 L^{\frac{d}{\beta}}}{\varepsilon^{\frac{d}{\beta}} \delta}\right).$$

This yields

$$N(\varepsilon, \delta) \leq C_1 \sigma^2 L^{\frac{d}{\beta}} \varepsilon^{-(\frac{d}{\beta}+2)} \log\left(\frac{C_2 L^{\frac{d}{\beta}}}{\varepsilon^{\frac{d}{\beta}} \delta}\right),$$

as claimed.

**Total failure probability.** We allocated  $\delta/4$  to the uniform estimation event  $\mathcal{E}$ . The remaining probability budget covers (i) the high-probability coupling used to argue Step 3 (choice of exploration constants to prevent premature refinement) and (ii) standard stopping events. Choosing constants so that each of these has probability at least  $1 - \delta/4$  yields an overall success probability at least  $1 - \delta$  by a union bound.  $\square$

## E EXPERIMENTAL SETUP AND HYPERPARAMETER SELECTION

### E.1 ENVIRONMENT CONFIGURATION

Our experimental evaluation encompasses diverse continuous control environments with configurable stochasticity to assess PM-DA-MCTS performance across varying action dimensionalities and noise levels. The test suite includes: Continuous CartPole, Stochastic Pendulum, Stochastic Mountain Car Continuous, and Stochastic Continuous Acrobot and MuJoCo-style Locomotion Improved Hopper.

All environments incorporate configurable stochasticity through three noise components:

$$\text{action\_noise\_scale} \in [0.02, 0.05] \tag{30}$$

$$\text{dynamics\_noise\_scale} \in [0.01, 0.7] \tag{31}$$

$$\text{obs\_noise\_scale} \in [0.0, 0.01] \tag{32}$$

### E.2 ALGORITHM CONFIGURATION

**PM-DA-MCTS Parameters.** We systematically evaluate power mean exponents  $p \in \{1.5, 2.0, 3.0, 4.0, 5.0\}$  and find optimal performance with  $p = 2.0$  across most environments, providing the best balance between exploration and exploitation. The discretization parameters are set as  $\varepsilon_1 = 0.5$  and  $\beta = 1.0$  (assuming unit Hölder continuity). We set the exploration constant  $C = 30$ .

For the polynomial exploration bonus, we use algorithmic constants satisfying the conditions in Table 1 with the optimal configuration:

$$\frac{\alpha_h}{\zeta_h} = \frac{1}{2} \tag{33}$$

$$\frac{b_h}{\zeta_h} = \frac{1}{4} \tag{34}$$

yielding the exploration bonus  $C \frac{N_s(n)^{1/4}}{N_{s,\alpha}(n)^{1/2}}$ .

**Baseline Method Configuration.** We compare against several state-of-the-art continuous action planning methods:

- **UCT with Discretization:** Fixed uniform grid discretization with  $C = 2.0$ .
- **Progressive Widening (PW):** Dimension-adaptive expansion using  $K(n) = \lfloor \alpha n^\beta \rfloor$  where  $\alpha = 0.5$  for  $d \leq 3$ ,  $\alpha = 0.3$  for  $d > 3$ , and  $\beta = 0.5$

- **HOOT (HOO over Trees):** Dimension-adaptive HOO parameters:

$$\rho = \begin{cases} 2^{-2/d} & \text{if } d = 1 \\ 2^{-1.5/d} & \text{if } d \leq 3 \\ 2^{-1/d} & \text{if } d \leq 8 \\ 2^{-0.7/d} & \text{if } d > 8 \end{cases} \quad (35)$$

$$\nu = \begin{cases} 4d & \text{if } d = 1 \\ 3.5d & \text{if } d \leq 3 \\ 2.5d & \text{if } d \leq 8 \\ 1.8d & \text{if } d > 8 \end{cases} \quad (36)$$

- **Polynomial HOOT (P-HOOT):** Power mean backup with polynomial exploration bonuses, using dimension-adaptive parameters:

$$\alpha = \begin{cases} 5 & \text{if } d = 1 \\ 3 & \text{if } d \leq 3 \\ 2 & \text{if } d \leq 8 \\ 1.5 & \text{if } d > 8 \end{cases} \quad (37)$$

$$\xi = \begin{cases} 20 & \text{if } d = 1 \\ 15 & \text{if } d \leq 3 \\ 10 & \text{if } d \leq 8 \\ 8 & \text{if } d > 8 \end{cases} \quad (38)$$

$$\eta = \begin{cases} 0.5 & \text{if } d = 1 \\ 0.4 & \text{if } d \leq 3 \\ 0.3 & \text{if } d \leq 8 \\ 0.25 & \text{if } d > 8 \end{cases} \quad (39)$$

### E.3 EXPERIMENTAL PROTOCOL

**Planning and Evaluation.** Each experiment uses the following protocol:

- **Planning budget:** 1000 MCTS simulations per re-planning step
- **Planning horizon:**  $H = 150$  steps with discount factor  $\gamma = 0.99$
- **Evaluation:** 20 independent runs with different random seeds
- **Re-planning frequency:** After each environment step during evaluation
- **Performance metric:** Cumulative discounted reward over 150 evaluation steps

**Iteration Budget Analysis.** We evaluate performance across multiple computational budgets using a geometric progression:

$$\text{base} = 1000^{1/15} \quad (40)$$

$$\text{samples}_i = \lfloor 3 \times \text{base}^i \rfloor, \quad i \in \{0, 1, 2, 3, 4, 5\} \quad (41)$$

This yields iteration budgets approximately in  $\{3, 4, 6, 8, 11, 16\} \times 100$  simulations.

**Dimension-Adaptive Rollout Strategy.** For computational efficiency in high-dimensional environments, we implement adaptive rollout strategies:

- **Low-dimensional** ( $d \leq 6$ ): Full tree search to maximum depth
- **High-dimensional** ( $d > 6$ ): Hybrid approach with rollout depth  $\min(20, H/2)$
- **Re-planning budget:** Full budget for  $d \leq 6$ , reduced to  $\max(\text{budget}/2, 100)$  for  $d > 6$

**Computational Resources.** All experiments were conducted on Intel(R) Core(TM) i9-14900K 3.20 GHz with 32 cores per CPU.

## F EXPONENTIAL DEPENDENCE ON $d$ AND GUARANTEES UNDER A CAPPED IMPLEMENTATION

**Unavoidable exponential term in  $d$ .** Under  $\beta$ -Hölder regularity of  $Q^*(s_0, \cdot)$  with constant  $L$  on a  $d$ -dimensional action set, any *planning* procedure that returns an  $\varepsilon$ -optimal action with high probability must localize the maximizer within a ball of radius  $\Theta((\varepsilon/L)^{1/\beta})$ . The metric entropy of such balls scales as  $\Theta((L/\varepsilon)^{d/\beta})$ ; with finite-variance rollouts, one additionally needs the usual  $\varepsilon^{-2}$  factor for mean estimation. Our analysis makes this precise at the root:

$$N(\varepsilon, \delta) \leq C_1 \sigma^2 L^{\frac{d}{\beta}} \varepsilon^{-(\frac{d}{\beta}+2)} \log \left( \frac{C_2 L^{\frac{d}{\beta}}}{\varepsilon^{\frac{d}{\beta}} \delta} \right),$$

i.e., an **exponential dependence in  $d$**  through the covering factor  $L^{d/\beta} \varepsilon^{-d/\beta}$  is *intrinsic* to continuous-action planning under  $\beta$ -Hölder assumptions; the extra  $\varepsilon^{-2}$  is the unavoidable Monte Carlo cost.

**Why fixed grids are insufficient; why *progressive refinement* is necessary.** A static  $\varepsilon$ -grid incurs an approximation floor of order  $L\varepsilon^\beta$  that does not vanish with more samples; hence it learns (at best) the grid optimum. In contrast, our schedule refines  $\varepsilon_k$  geometrically and triggers refinement only when the geometric term  $L\varepsilon_k^\beta$  and the statistical term balance. This is what yields the end-to-end bound above.

**Theorem 4** (Sample Complexity with Polynomial-tail Estimates). *PM-DA-MCTS returns an  $\varepsilon$ -optimal action at  $s_0$  with probability at least  $1 - \delta$  after at most*

$$N(\varepsilon, \delta) \leq C_1 \sigma^2 L^{\frac{d}{\beta}} \varepsilon^{-(\frac{d}{\beta}+2)} \log \left( \frac{C_2 L^{\frac{d}{\beta}}}{\varepsilon^{\frac{d}{\beta}} \delta} \right),$$

where  $C_1, C_2 > 0$  depend only on  $d, \beta$  and the refinement/selection constants (but not on  $\varepsilon, \delta, L, \sigma$ ).

**Lower bound.** The minimax rate for continuum-armed bandits with  $\beta$ -Hölder smoothness already appears in the *X-armed bandits* analysis of Bubeck et al. (2011). Let  $(\mathcal{X}, \ell)$  be a metric space with packing numbers  $N(\mathcal{X}, \ell, \varepsilon) \gtrsim \varepsilon^{-D}$ . Theorem 13 in Bubeck et al. (2011) gives a cumulative-regret lower bound of order  $n^{(D+1)/(D+2)}$ ; for  $\ell(x, y) \asymp \|x - y\|^\beta$  on  $[0, 1]^d$  this yields  $D = d/\beta$ . Standard conversion to fixed-confidence simple regret (or a direct Fano/packing argument with “bump” functions of radius  $\Theta((\varepsilon/L)^{1/\beta})$  and height  $\Theta(\varepsilon)$ ) then implies that any planner returning an  $\varepsilon$ -optimal action with probability at least  $1 - \delta$  must use at least

$$N(\varepsilon, \delta) \geq c \sigma^2 L^{\frac{d}{\beta}} \varepsilon^{-(\frac{d}{\beta}+2)}$$

samples, up to logarithmic factors. Hence the  $L^{d/\beta} \varepsilon^{-d/\beta}$  dependence is information-theoretically necessary. Our upper bound (Theorem 4) matches this rate up to logarithms.

**Capped implementation and coverage along the realized search.** The analysis indexes children at level  $k$  via an abstract  $\varepsilon_k$ -net to guarantee the *covering property* in each *visited* cell  $v$ :

$$\forall x \in \text{cell}(v) \exists a \in N_k : \|x - a\| \leq \varepsilon_k. \quad (\star)$$

To enforce  $(\star)$  *without materializing a full net*, we instantiate *capped random* anchors: draw  $M_k$  i.i.d. points uniformly in the current cell and keep at most a cap  $M_k^{\max}$ . The following standard fact controls coverage.

**Lemma 11** (High-probability coverage of a random capped net). *Let  $\mathcal{R}_k \subset \mathbb{R}^d$  be a measurable region of diameter  $D_k \in (0, \infty)$  and let  $\varepsilon_k \in (0, D_k]$ . Draw  $M_k$  i.i.d. anchors  $A_1, \dots, A_{M_k}$  uniformly from  $\mathcal{R}_k$ , and let*

$$\tilde{\varepsilon}(M_k) := \sup_{x \in \mathcal{R}_k} \min_{1 \leq j \leq M_k} \|x - A_j\|_2$$

*be the random covering radius of the anchor set. There exist constants  $c_d, C_d \in (0, \infty)$ , depending only on  $d$  and on a shape-regularity constant of  $\mathcal{R}_k$ , such that:*

(i) For any confidence parameters  $\delta \in (0, 1)$  and  $T \geq 1$ , if

$$M_k \geq c_d \left( \frac{D_k}{\varepsilon_k} \right)^d \left( \log \left( \frac{D_k}{\varepsilon_k} \right) + \log \left( \frac{T}{\delta} \right) \right),$$

then  $\tilde{\varepsilon}(M_k) \leq \varepsilon_k$  with probability at least  $1 - \delta/T$ ; equivalently, the anchors form an  $\varepsilon_k$ -net of  $\mathcal{R}_k$  w.p.  $\geq 1 - \delta/T$ .

(ii) (Rate) There exist  $c'_d, C'_d > 0$  such that, for all large  $M_k$ ,

$$\Pr \left\{ \tilde{\varepsilon}(M_k) \leq C'_d D_k \left( \frac{\log M_k}{M_k} \right)^{1/d} \right\} \geq 1 - M_k^{-2}.$$

In particular,  $\tilde{\varepsilon}(M_k) = \Theta(D_k (\log M_k / M_k)^{1/d})$  w.h.p.

**Proof. 1: A volumetric discretization.** Partition  $\mathcal{R}_k$  into  $m$  axis-aligned cubes of side  $s := \varepsilon_k / (2\sqrt{d})$  (discarding partial cubes outside  $\mathcal{R}_k$ ); by shape regularity there exist constants  $0 < c_1 \leq c_2 < \infty$  (depending on  $d$ ) such that

$$c_1 \left( \frac{D_k}{\varepsilon_k} \right)^d \leq m \leq c_2 \left( \frac{D_k}{\varepsilon_k} \right)^d.$$

Let  $C_1, \dots, C_m$  denote these microcells and write  $p_j := \text{vol}(C_j) / \text{vol}(\mathcal{R}_k)$ . Then  $p_j \geq c_3 (\varepsilon_k / D_k)^d$  for some  $c_3 = c_3(d) > 0$ .

**2: Empty-cell probability and union bound.** For any fixed  $j$ , the probability  $C_j$  is empty is  $\Pr\{C_j \text{ empty}\} = (1 - p_j)^{M_k} \leq \exp(-p_j M_k) \leq \exp(-c_3 M_k (\varepsilon_k / D_k)^d)$ . By a union bound over the  $m$  cells,

$$\Pr\{\exists j : C_j \text{ empty}\} \leq m \exp(-c_3 M_k (\varepsilon_k / D_k)^d).$$

Therefore, if  $M_k \geq (1/c_3) (D_k / \varepsilon_k)^d (\log m + \log(T/\delta))$ , then  $\Pr\{\text{all cells hit}\} \geq 1 - \delta/T$ . Using  $\log m \leq C_4 \log(D_k / \varepsilon_k)$  and  $m \leq c_2 (D_k / \varepsilon_k)^d$  yields the stated condition with  $c_d$  large enough.

**3: From nonempty cells to an  $\varepsilon_k$ -net.** If every  $C_j$  is hit by at least one anchor, then for any  $x \in \mathcal{R}_k$  the unique cell  $C_j$  containing  $x$  also contains some anchor  $A_j$ ; since the cell diameter in  $\ell_2$  is  $\sqrt{d} s = \varepsilon_k / 2$ , we have  $\|x - A_j\|_2 \leq \varepsilon_k / 2$ , hence  $\tilde{\varepsilon}(M_k) \leq \varepsilon_k$ .

**4: The rate in (ii).** Let  $\varepsilon > 0$  be chosen so that  $m \asymp (D_k / \varepsilon)^d$  and  $p_j \gtrsim (\varepsilon / D_k)^d$ . Repeating Step 2 with failure target  $M_k^{-2}$  shows

$$\Pr\{\tilde{\varepsilon}(M_k) > \varepsilon\} \lesssim (D_k / \varepsilon)^d \exp(-c M_k (\varepsilon / D_k)^d).$$

Solving  $(D_k / \varepsilon)^d \exp(-c M_k (\varepsilon / D_k)^d) \leq M_k^{-2}$  gives  $\varepsilon \lesssim D_k (\log M_k / M_k)^{1/d}$  and yields the claim.  $\square$

**Corollary 5** (Finite-variance guarantee under a capped implementation). *Run PM-DA-MCTS with the usual selection/refinement rule. At each visited node whose current level is  $k$ , instantiate at most  $M_k^{\max}$  random anchors uniformly in the node's region  $\mathcal{R}_k$ , where*

$$M_k^{\max} \geq c_d \left( \frac{D_k}{\varepsilon_k} \right)^d \left( \log \left( \frac{T}{\delta} \right) + \log \left( \frac{D_k}{\varepsilon_k} \right) \right)$$

for all levels  $k \leq k_*$  actually reached by the search (constants as in Lemma 11). Then, with probability at least  $1 - \delta$ , the covering property

$$(\star) \quad \forall x \in \mathcal{R}_k \exists a \text{ (instantiated at level } k) : \|x - a\|_2 \leq \varepsilon_k$$

holds simultaneously for every visited node/level up to  $k_*$ ; consequently the geometric optimism term at that node remains  $L\varepsilon_k^\beta$ , and the sample-complexity bound of Theorem 4 continues to hold up to absolute constants and polylogarithmic factors.

*Proof.* Apply Lemma 11(i) independently at every *visited* node/level, with per-event failure budget  $\delta/(2T)$ , where  $T$  upper-bounds the total number of such (node,level) pairs reachable under the rollout budget (a standard polynomial envelope in the main proof). A union bound yields that  $(\star)$  holds at all visited nodes with probability at least  $1 - \delta/2$ .

On this high-probability event, for each visited node the discretization (geometric) error is uniformly bounded by  $L\varepsilon_k^\beta$  exactly as in the idealized analysis that assumes a global  $\varepsilon_k$ -net. The selection rule is unchanged; only actions that are instantiated can be chosen, but  $(\star)$  guarantees that an  $\varepsilon_k$ -near-optimal anchor exists among them. The concentration of the power-mean backups with polynomial bonuses (node-wise polynomial tails and their depth-wise propagation) depends on visit counts and tail exponents, not on how the anchors were *generated*. Therefore, the coupling used in the proof of Theorem 4 goes through verbatim: the algorithm refines only when the statistical and geometric terms balance, and when it stops at level  $k_\star$  the selected action is  $\varepsilon$ -optimal at the root with probability at least  $1 - \delta$ . The only change is an additional (benign) logarithmic factor  $\log(D_k/\varepsilon_k)$  from Lemma 11, which is absorbed by the global  $\log(C_2 L^{d/\beta}/(\varepsilon^{d/\beta}\delta))$  term already present in Theorem 4.  $\square$

**Takeaways for complexity and practice.** (i) The *exponential*  $L^{d/\beta}\varepsilon^{-d/\beta}$  factor is the geometric price of localizing the maximizer in  $d$  dimensions under  $\beta$ -Hölder smoothness; the  $\varepsilon^{-2}$  factor is the statistical price of finite-variance estimation. (ii) The capped, on-demand anchor generation avoids materializing a full net while *preserving* the covering guarantees needed by the proof along the actually visited cells; in code we use small caps (e.g., 1.5–2K per level for  $d \leq 8/d > 8$ ) because  $k_\star$  is limited by the budget, and the optimistic path touches few cells.
